# Supplementary material for: De-ubiquitination of SAMHD1 by USP7 promotes DNA damage repair to overcome oncogenic stress and affect chemotherapy sensitivity
Source: PubMed Central journal article supplement (PMC10238270; doi:10.1038/s41388-023-02667-w), 2023-04-20

# Figure S1

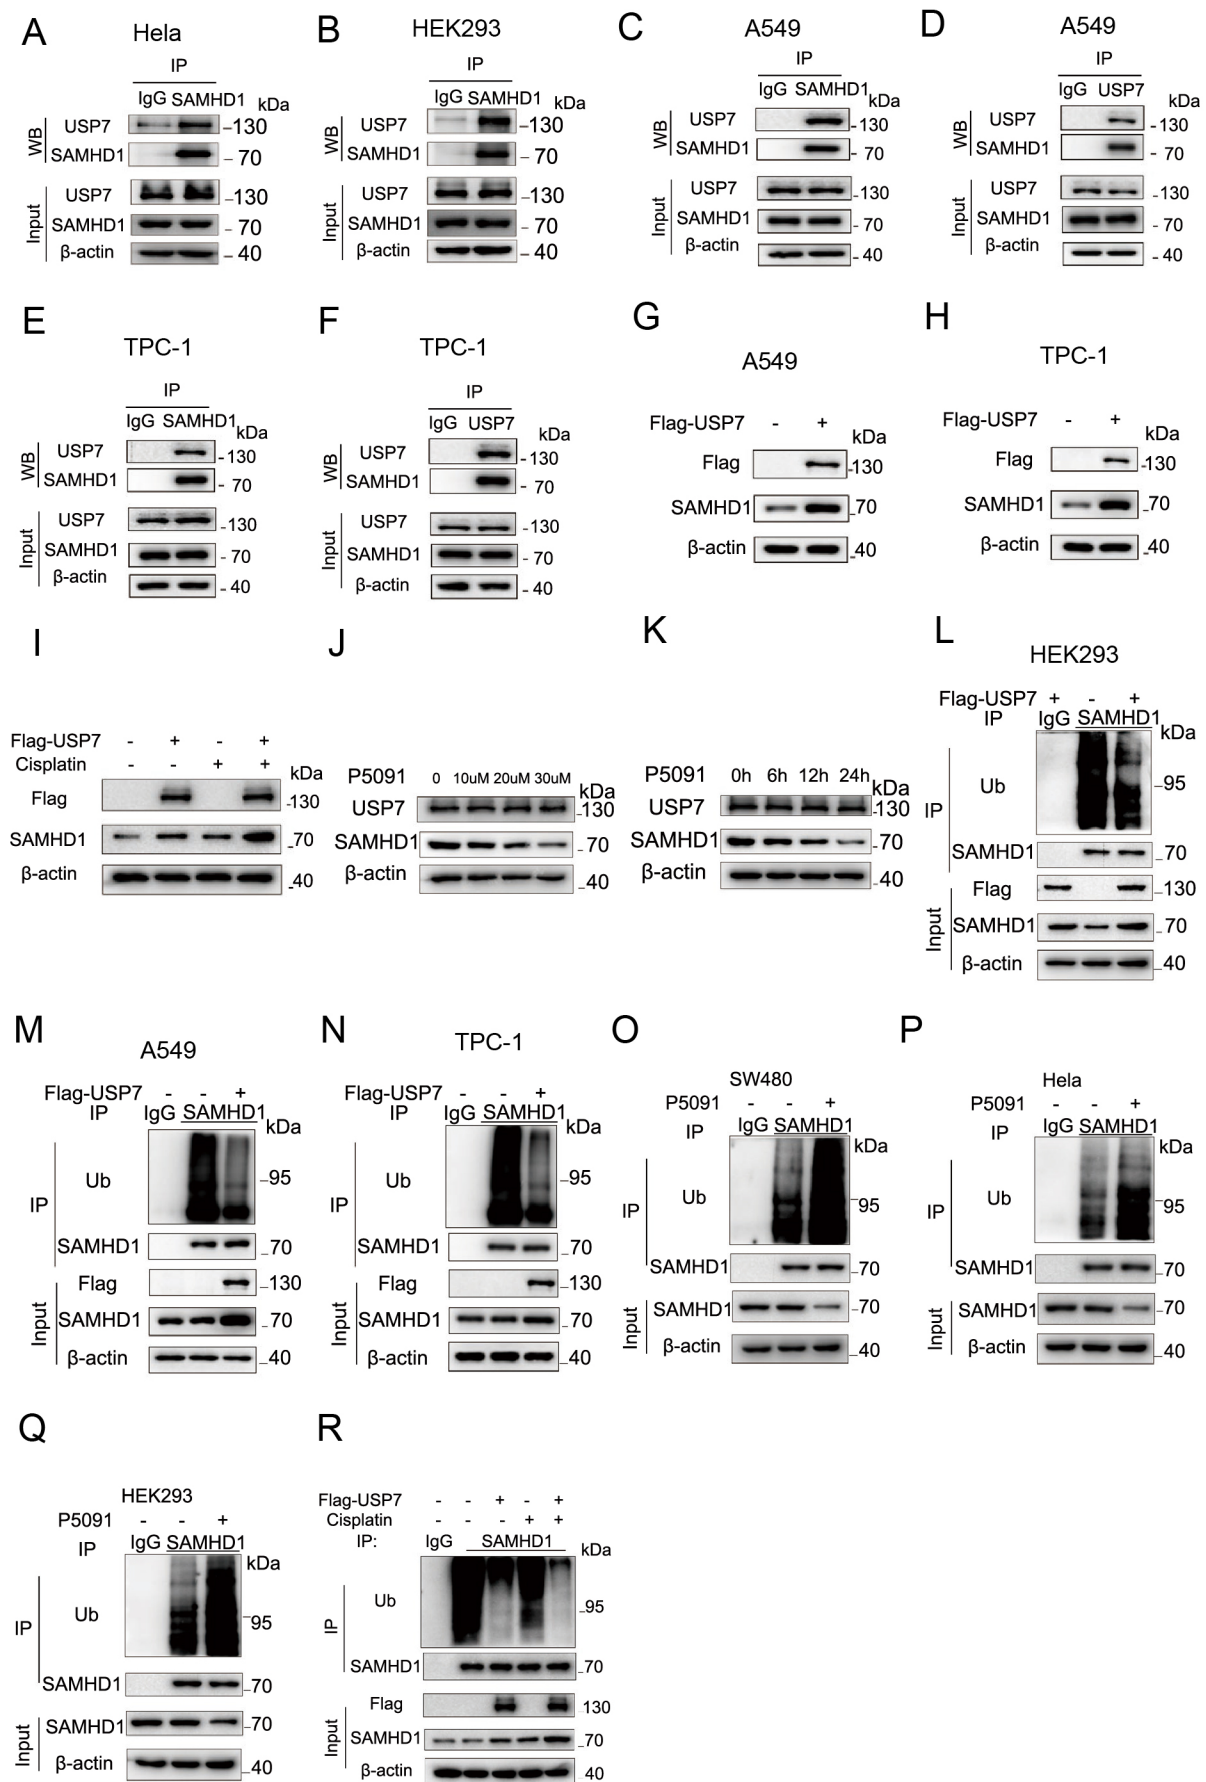

# Figure S2

**A**

**K421**

YRISTAIDDMEAYTKLTDNIFLLEILLYSITDIPK

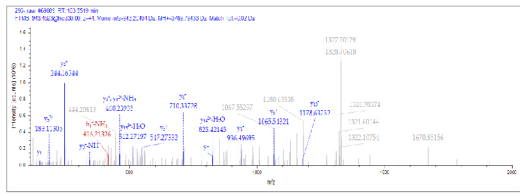

**B**

**K492**

VLLDVKLKAEDFTIVDIVINMIDYGMQIEK

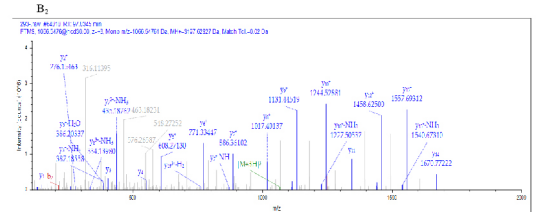

**C**

**K494**

VLLDVKLKAEDFTIVDIVINMIDYGMQIEK

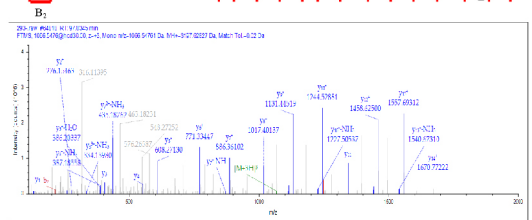

**D**

Homo sapiens (415-427)  
Mus musculus (427-439)  
Pan troglodytes (415-427)  
Rattus norvegicus (420-432)  
Gallus gallus (406-418)  
Bos taurus (404-416)

DMEAYTKLTDNIF  
DMEAFKLTNDIF  
DMEAYTKLTDNIF  
DMEAFSKLTNDIF  
DMEAYTKLTDNIY  
DMEAFKLTNDIF

**E**

**F**

**G**

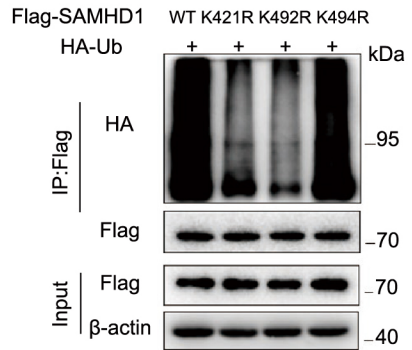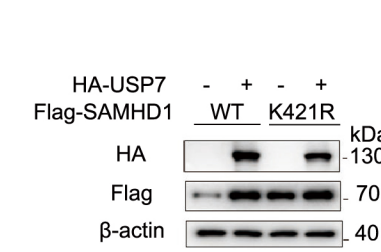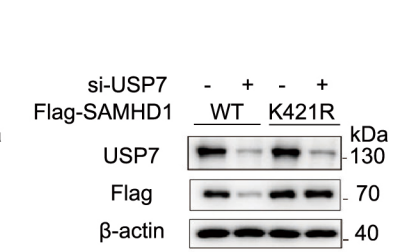

**H**

**I**

**J**

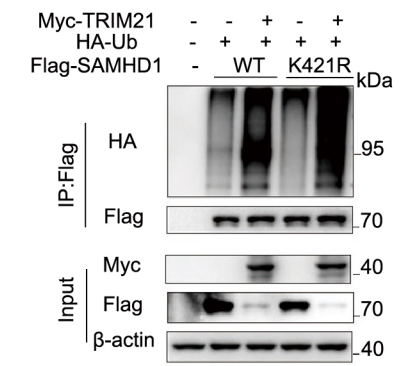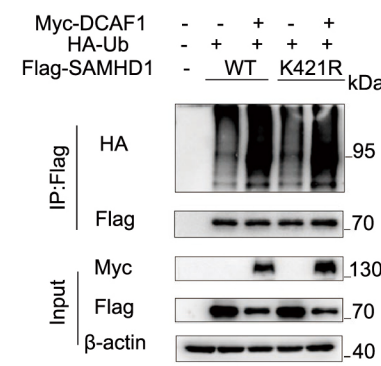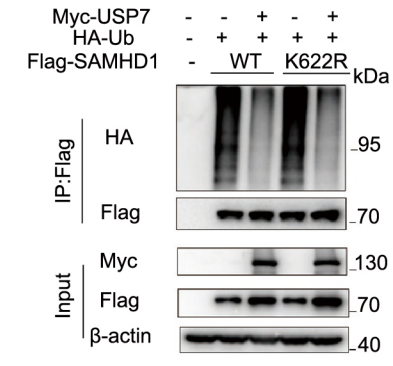

# Figure S3

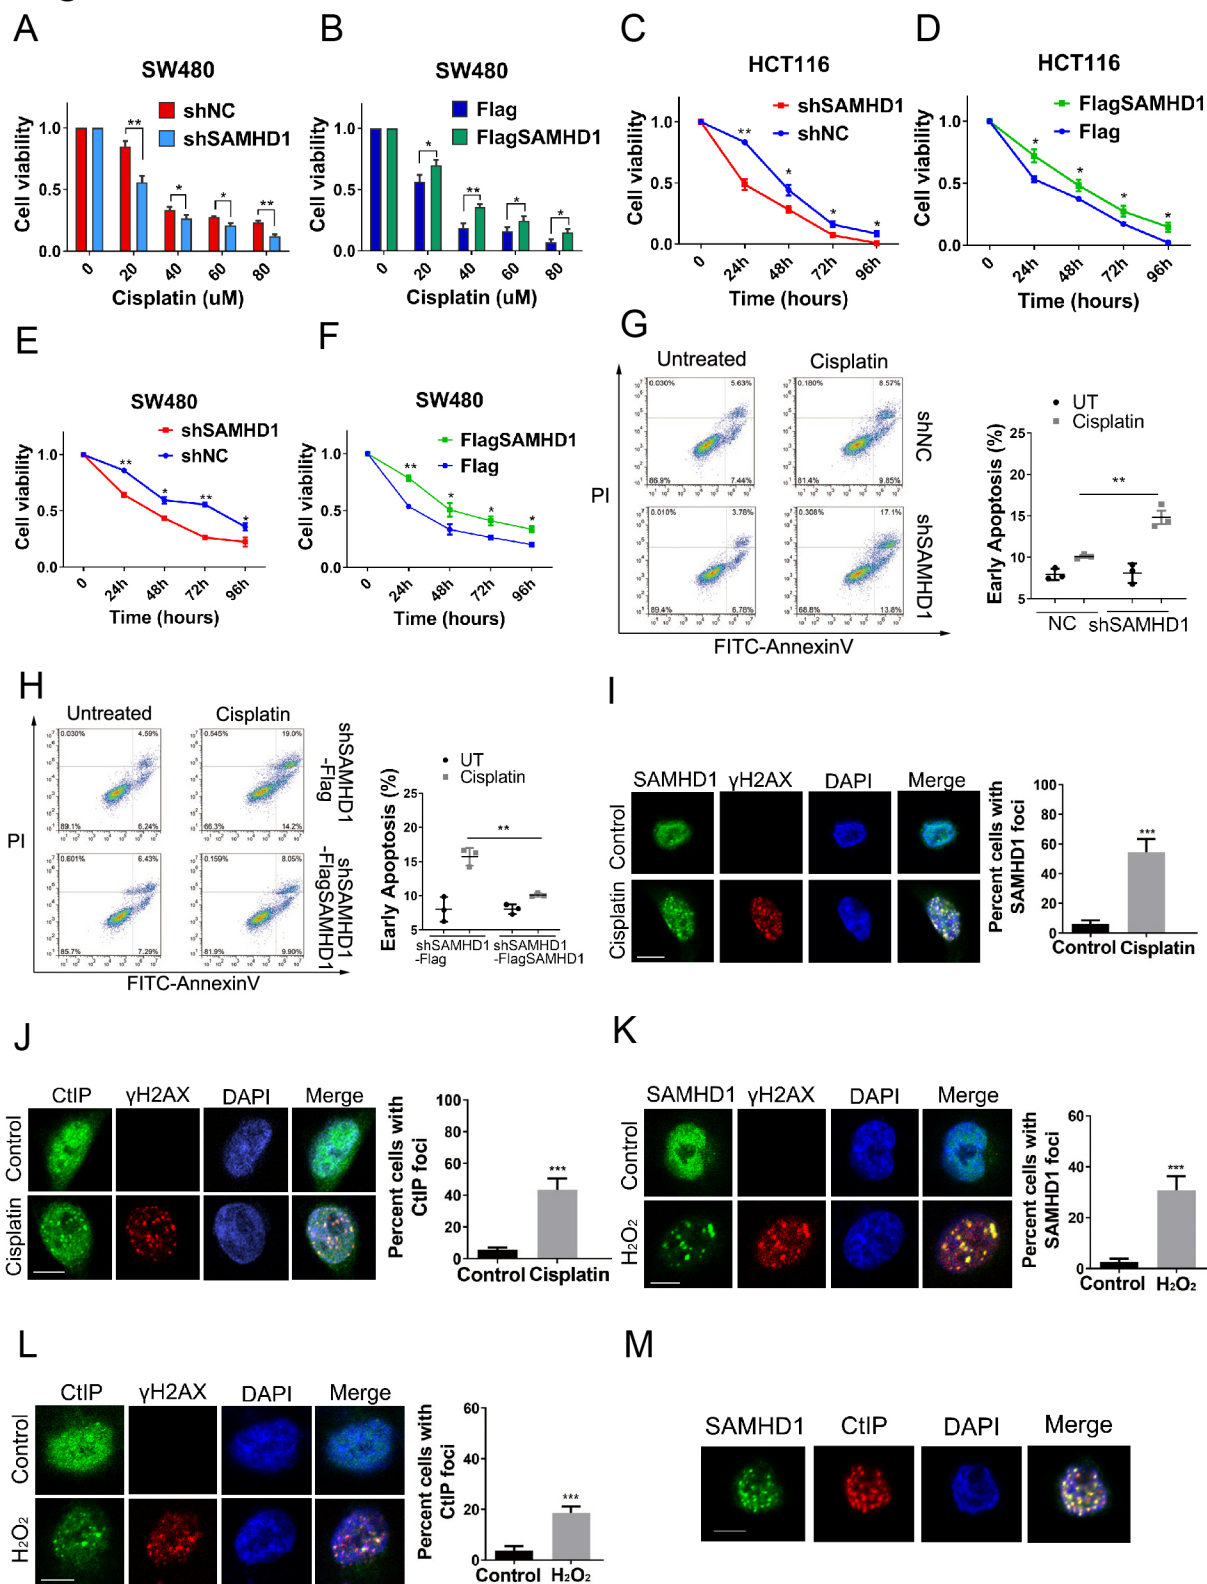

# Figure S4

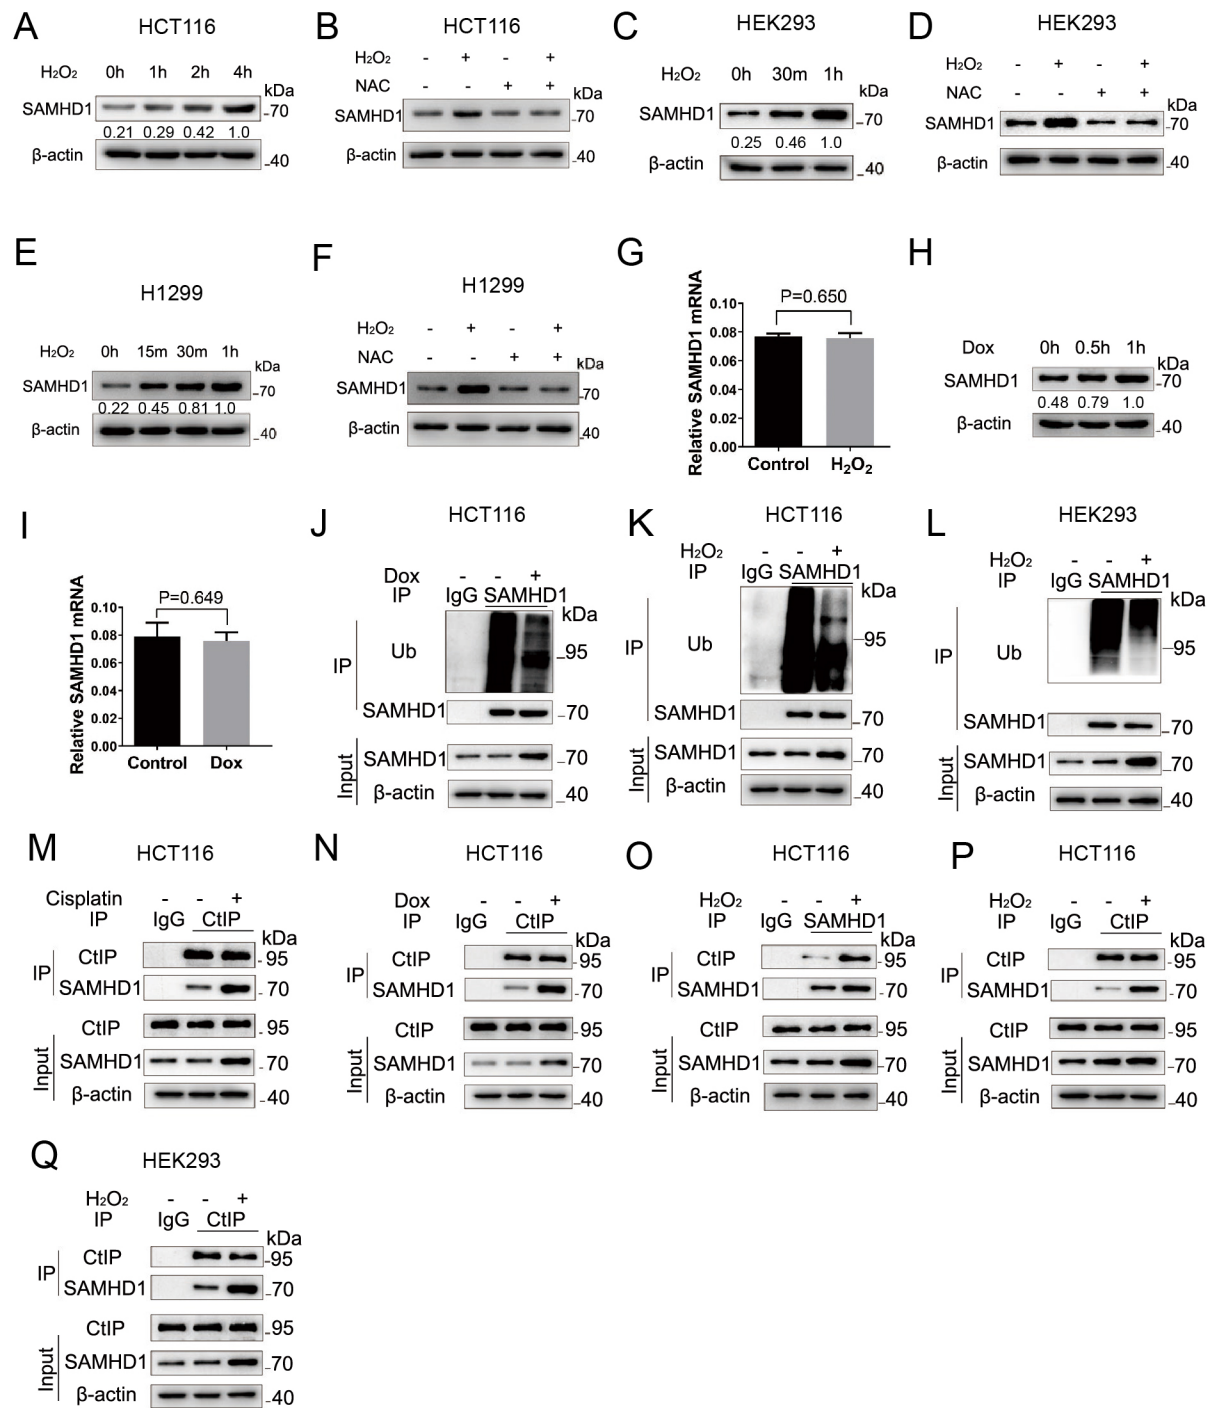

# Figure S5

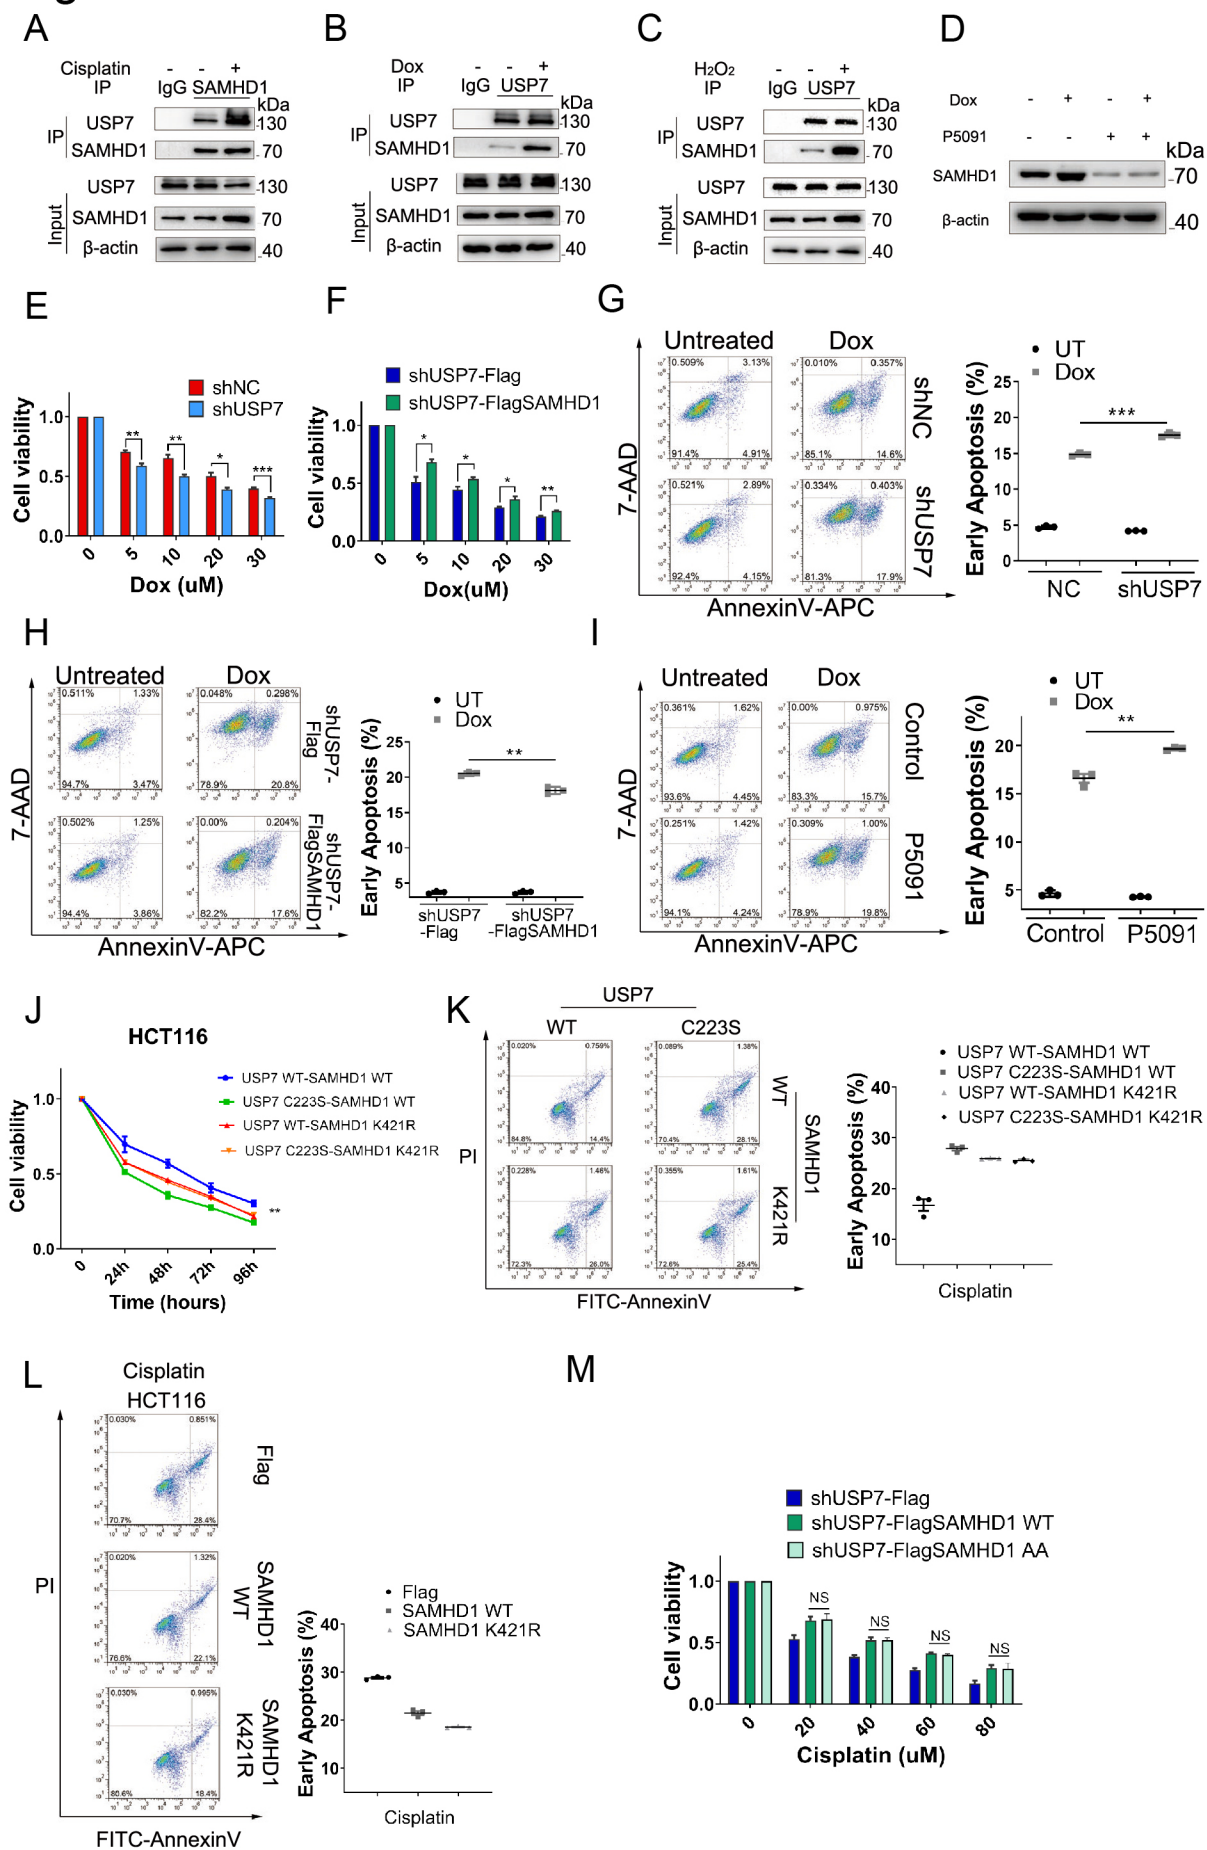

# Figure S6

A

| Colon adenocarcinoma | SAMHD1 expression |        |      | n  | P      |
|----------------------|-------------------|--------|------|----|--------|
|                      | Low               | Medium | High |    |        |
| Tumor                | 4                 | 15     | 11   | 30 | <0.001 |
| Peritumor            | 25                | 4      | 1    | 30 |        |

B

| Lung adenocarcinoma | SAMHD1 expression |        |      | n  | P      |
|---------------------|-------------------|--------|------|----|--------|
|                     | Low               | Medium | High |    |        |
| Tumor               | 8                 | 25     | 15   | 48 | <0.001 |
| Peritumor           | 33                | 12     | 3    | 48 |        |

C

| Thyroid carcinoma | SAMHD1 expression |        |      | n  | P      |
|-------------------|-------------------|--------|------|----|--------|
|                   | Low               | Medium | High |    |        |
| Tumor             | 13                | 23     | 22   | 58 | <0.001 |
| Peritumor         | 49                | 9      | 0    | 58 |        |

D

| Colon adenocarcinoma | USP7 expression |        |      | n  | P      |
|----------------------|-----------------|--------|------|----|--------|
|                      | Low             | Medium | High |    |        |
| Tumor                | 10              | 11     | 9    | 30 | <0.001 |
| Peritumor            | 28              | 1      | 1    | 30 |        |

E

| Lung adenocarcinoma | USP7 expression |        |      | n  | P      |
|---------------------|-----------------|--------|------|----|--------|
|                     | Low             | Medium | High |    |        |
| Tumor               | 11              | 29     | 8    | 48 | <0.001 |
| Peritumor           | 34              | 12     | 2    | 48 |        |

F

| Thyroid carcinoma | USP7 expression |        |      | n  | P      |
|-------------------|-----------------|--------|------|----|--------|
|                   | Low             | Medium | High |    |        |
| Tumor             | 2               | 25     | 31   | 58 | <0.001 |
| Peritumor         | 38              | 19     | 1    | 58 |        |

# Figure S7

**A**

| Colon adenocarcinoma | SAMHD1 expression |      |     | HR   | 95%CI     | P     |
|----------------------|-------------------|------|-----|------|-----------|-------|
|                      | Low               | High | n   |      |           |       |
| Live                 | 78                | 45   | 123 | 2.15 | 1.07-4.32 | 0.020 |
| Death                | 15                | 19   | 34  |      |           |       |

**B**

| Lung adenocarcinoma | SAMHD1 expression |      |     | HR   | 95%CI     | P     |
|---------------------|-------------------|------|-----|------|-----------|-------|
|                     | Low               | High | n   |      |           |       |
| Live                | 22                | 86   | 108 | 3.34 | 1.65-6.74 | 0.030 |
| Death               | 3                 | 62   | 65  |      |           |       |

**C**

| Glioblastoma | SAMHD1 expression |      |    | HR   | 95%CI     | P     |
|--------------|-------------------|------|----|------|-----------|-------|
|              | Low               | High | n  |      |           |       |
| Live         | 4                 | 23   | 27 | 1.99 | 1.17-3.38 | 0.034 |
| Death        | 9                 | 87   | 96 |      |           |       |

**D**

| Glioma | SAMHD1 expression |      |     | HR   | 95%CI     | P     |
|--------|-------------------|------|-----|------|-----------|-------|
|        | Low               | High | n   |      |           |       |
| Live   | 142               | 39   | 181 | 1.56 | 1.00-2.43 | 0.026 |
| Death  | 76                | 35   | 111 |      |           |       |

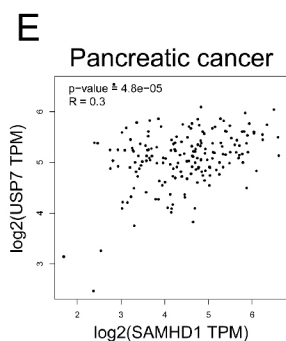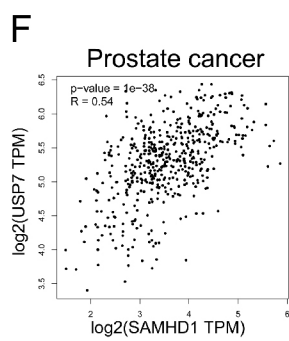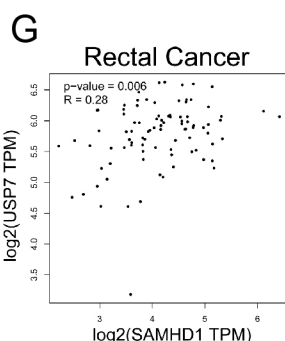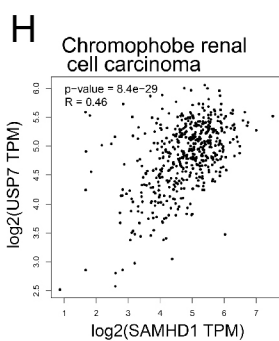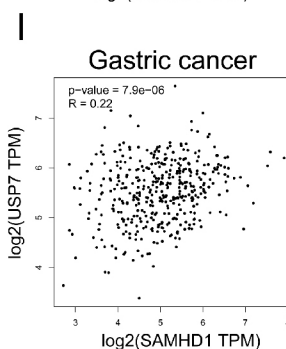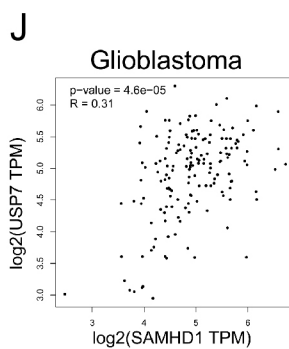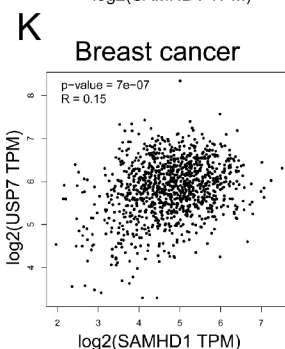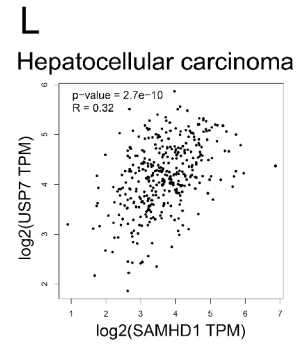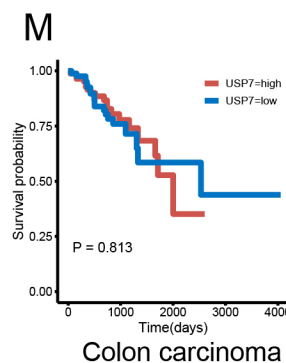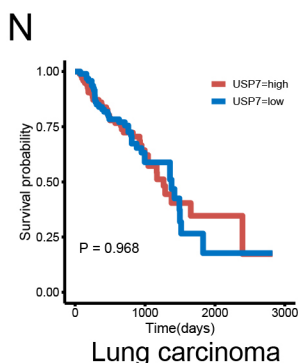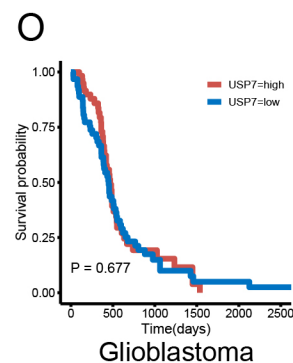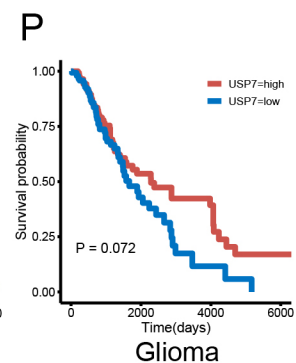

Supplement: 41388_2023_2667_MOESM1_ESM.pdf [file 41388_2023_2667_MOESM1_ESM.pdf]
